# Supplementary material for: 2’FY-RNA aptamers form metastable multimeric G-quadruplexes that selectively bind pyoverdines
Source: Research Square preprint supplement (doi:10.21203/rs.3.rs-7885693/v1), 2025-11-04
Supplement: Supplementary file 1 [file a3ceb8c015f46b5793b4f0e3.pdf]

## ***Supplementary Material***

### **2'FY-RNA aptamers form metastable multimeric G-quadruplexes that selectively bind pyoverdines**

Sharif Anisuzzaman, Joshua Alterman, George A Kraus, and Marit Nilsen-Hamilton

#### **Table of contents:**

- 1 Synthesis of pyoverdine chromophores
- 2 Aptamer selection
- 3 Supplementary Tables  
Table S1: Nucleic acid sequences used in this study.  
Table S2: Conditions of selection in the SELEX protocol
- 4 Supplementary Figures  
S1: uv/vis absorption spectra of synthesized compounds 1-4  
S2: Analysis of NextGen sequencing results  
S3: 2D structures predicted for the aptamers  
S4: The effect of aptamers on the fluorescence spectrum of HPTA-1  
S5: The effect of freeze-thaw on the CD spectrum and molecular size of 57PYO3A  
S6: The effect of salt combinations on PVD-Pf5 binding to 57PYO3A  
S7-S12: Smoothed overlaid on raw spectra  
S13: Complete gel images used for manuscript figures
- 5 Citations



## Supplementary materials

### 1 Synthesis of pyoverdine chromophores

Amide ester acid 4. To a round bottom was added nitro lactam A followed by ethyl bromoacetate, DMF, and NaH. The solution was heated to 100°C overnight and quenched with aq. sodium bicarbonate. Washes with ethyl acetate were done 3x (10 mL / 1 mmol) and the organics were dried over sodium sulfate. The solution was filtered over cotton and concentrated in vacuo. The crude material was separated by column chromatography with ethyl acetate and hexane gave the desired nitro lactam ester plus some O-alkylated product. <sup>1</sup>H NMR (400 MHz, Chloroform-d)  $\delta$  8.64 (s, 1H), 7.08 (s, 1H), 6.53 (s, 1H), 5.15 (s, 2H), 4.25 (q, J = 7.1 Hz, 2H), 4.00 (s, 3H), 3.96 (s, 3H), 1.37 – 1.17 (m, 3H). <sup>13</sup>C NMR (101 MHz, Chloroform-d)  $\delta$  167.30, 156.29, 154.06, 146.70, 138.11, 136.14, 110.66, 110.42, 96.53, 96.49, 62.19, 56.49, 56.34, 44.76, 14.19. The nitro group was reduced using excess Fe and aqueous HCl in ethanol. The resulting product was acylated with succinic anhydride to provide amide ester acid 4.

Nitro azetidine ester 1. To an oven dried flask was charged nitro lactam A followed by thionyl chloride (20-30 mol. Eq.) and catalytic amounts of DMF. The solution was heated to 98 °C and left to react overnight. Upon cooling, 2-chloro-6,7-dimethoxy-3-nitro quinoline precipitates as a solid. Thionyl chloride was vacuum distilled at 60 °C with two cold traps until dry. The yellow chloro quinoline obtained was used either in its crude state or re-dissolved in DCM and washed with brine. DCM was dried over sodium sulfate and filtered, and the solvent removed in vacuo to give a yellow solid. <sup>1</sup>H NMR (400 MHz, Chloroform-d)  $\delta$  8.63 (s, 1H), 7.41 (s, 1H), 7.14 (s, 1H), 4.07 (s, 3H), 4.05 (s, 3H).

To an oven dried flask was charged 2-chloro-6,7-dimethoxy-3-nitro quinoline and the azetidine ester (1 mol. Eq.), followed by DMF (3mL / 1 mmol) and TEA (2.1 mol. Eq.). The solution was heated to 92 °C and stirred overnight. The DMF was vacuum distilled off and the crude material was dissolved in DCM and wet loaded onto a column. Separation with a gradient of hexane:ethyl acetate (1:0 – 6:4) afforded compound 1 as a red solid (~80% yield). <sup>1</sup>H NMR (400 MHz, Chloroform-d)  $\delta$  8.54 (s, 1H), 7.05 (s, 1H), 6.94 (s, 1H), 5.20 (dd, J = 9.5, 5.6 Hz, 1H), 4.42 (td, J = 8.9, 6.3 Hz, 1H), 4.05- 3.98 (m, 1H), 4.01 (s, 3H), 3.96 (s, 3H), 3.73 (s, 3H, O2Me), 2.71 (dtd, J = 10.7, 9.2, 6.3 Hz, 1H), 2.38 (ddt, J = 11.0, 9.0, 5.7 Hz, 1H). <sup>1</sup>H NMR (400 MHz, DMSO-d6)  $\delta$  8.77 (s, 1H), 7.37 (s, 1H), 6.97 (s, 1H), 5.08 (dd, J = 9.7, 5.9 Hz, 1H), 4.17 (q, J = 8.3 Hz, 1H), 3.99-3.81(m, 1H), 3.93 (s, 3H), 3.85 (s, 3H), 3.67 (s, 3H), 2.75 – 2.59 (m, 1H), 2.31 (tt, J = 10.7, 5.7 Hz, 1H). <sup>13</sup>C NMR (101 MHz, DMSO-d6)  $\delta$  172.30, 156.27, 148.78, 148.42, 146.74, 134.46, 131.56, 116.96, 107.16, 105.61, 62.03, 56.44, 56.11, 52.41, 50.69, 31.12.

Amino acid 2 and amide acid 3. A flask was charged with 1 followed by hydroiodic acid (~6 mL / 1 mmol) and allowed to stir until homogenized. The solution was then heated to 66 °C until dry. The beige material was analyzed without purification. <sup>1</sup>H NMR (400 MHz, DMSO-d6)  $\delta$  11.37 (s, 1H), 9.03 (s, 1H), 7.52 (s, 2H), 7.30 (s, 1H), 7.09 (s, 1H), 4.40 (d, J = 5.8 Hz, 1H), 3.83 (s, 3H), 3.79 (s, 3H), 3.51 (q, J = 6.1 Hz, 1H), 3.26 (dq, J = 40.4, 8.4 Hz, 2H), 1.92 (q, J = 7.3 Hz, 1H). The crude product was dissolved in chloroform and treated with excess acetic anhydride.



## **2 Aptamer selection**

This protocol was designed to isolate aptamers with the characteristics of high affinities and specificities for the ligand and for switching structure on binding the ligand. In addition, the presence of complementary oligonucleotides to the PCR primer sequences during selection limited structure selection to the single-stranded central randomized region. Aptamer selection started with a high molar ratio of pool to PVD-Pf5 (1:1) and a harmonic increase of pool to target PVD-Pf5 in later cycles to increase the selection pressure<sup>1</sup>. Counter selections were performed after rounds 3 and 6 against a mixture of two other siderophores, enterobactin (ENB) and ornibactin (ORB), to eliminate nonspecific binders (Fig. 1A). With the assumption that the oligonucleotide complex with PVD-Pf5 is stoichiometric, this selection protocol resulted in 60% of PVD-Pf5 bound by oligonucleotide by round 9 (Fig. 1C). Analysis of the NextGen sequencing results showed that incremental rounds of selection were characterized by increases in the unique fraction (number of sequences in the pool divided by the pool size) and the enriched species (sequences present in the pool more than once), which is characteristic of a successful selection procedure (Fig. S2).

The results of next generation sequencing for oligonucleotide pools from several rounds, including the final round of each selection provided the data for identifying potential aptamer sequences. Sequence clusters were identified with Aptasuite<sup>2</sup> and, based on the size of the cluster and the rise in enriched species through the rounds, several oligonucleotides were evaluated for binding the PVD-Pf5 chromophore by identifying increases in pyoverdine fluorescence when bound to the oligonucleotide.



## 3 Supplementary tables

Table S1. Nucleic acid sequences used in this study.

Commented [MN1]: Sharif, Please correct/update this table

| Name       | Sequence                                                                                                     |
|------------|--------------------------------------------------------------------------------------------------------------|
| Oligo 5627 | TAATACGACTCACTATAGGGAGACAAGAATAAACGCTC                                                                       |
| Oligo 5628 | GAGCGTTTATTCTTGCTCTCCC                                                                                       |
| Oligo 5629 | GCCTGTTGTGAGCCTCCTGTCTGAA                                                                                    |
| Oligo 5637 | GCCTGTTGTGAGCCTCCTGTCTGAAGTATGCGATAGGAGCGAATGATATATATCAAGT<br>TACCACACGATGTACTTGCTTGAGCGTTTATTCTTGCTCTCCC    |
| Oligo 5651 | GGGAGACAAGAAUAAACGCUCUCCAAAGAGCACUCCAUCGAUGGUCGUUUUUCGC<br>ACAUUCGCUCUCCGCAUAGACGUUCGACAGGAGGCUCACAACAGGC    |
| Oligo 5652 | GGGAGACAAGAAUAAACGCUCGUUACGAAGAAACUUUCCCGUUAACGUGCCAAAU<br>UCAUUCGCUCUCCGAAUUGGGCAUUCGACAGGAGGCUCACAACAGGC   |
| Oligo 5653 | GGGAGACAAGAAUAAACGCUCAGCUUUAACUGAUGCUCAGAUUCUCCAAUGUGG<br>GCAUUCGCUCUCCGGUUGACGUUUCGACAGGAGGCUCACAACAGGC     |
| Oligo 5654 | GGGAGACAAGAAUAAACGCUCGACCGUUCAGAAAACGAACAGUCUAGUGUCGUCG<br>ACAUUCGCUCUCCGGUGAUGC UUUCGACAGGAGGCUCACAACAGGC   |
| Oligo 5662 | GGGAGACAAGAAUAAACGCUCGCUCAUUAACAUUGC UU AUGAGCGCGUCAUAAUG<br>ACAUUCGCUCUCCAUUAUGGGCUUCGACAGGAGGCUCACAACAGGC  |
| Oligo 5663 | GGGAGACAAGAAUAAACGCUCGCUUGUGCAUGCAAAUGAUCCAGCAAGUAGCACAG<br>UCAUUCGCUCUCCUGUGAUGC UUUCGACAGGAGGCUCACAACAGGC  |
| Oligo 5664 | GGGAGACAAGAAUAAACGCUCACACGCCACUCUCCA AUGGUGUGACAGCAAUC<br>UCAUUCGCUCUCCAGAUUGAGGCUUCGACAGGAGGCUCACAACAGGC    |
| Oligo 5665 | GGGAGACAAGAAUAAACGCUCUCCGUGGAUGCAUCUGAGUACUACGUAGCGCGCUUU<br>UCAUUCGCUCUCCAUUGCGGGCUUUCGACAGGAGGCUCACAACAGGC |
| Oligo 5666 | GGGAGACAAGAAUAAACGCUCUCGAGUCACGAAACAUGCCUCGUCGUCACGCGU<br>ACAUUCGCUCUCCAGUAUGAGCUUCGACAGGAGGCUCACAACAGGC     |
| Oligo 5667 | GGGAGACAAGAAUAAACGCUCUACGCUAGCCACAACGGCAGCUAUACGAUGCUCG<br>ACAUUCGCUCUCCGAGCUGAGUUUCGACAGGAGGCUCACAACAGGC    |
| Oligo 5668 | GGGAGACAAGAAUAAACGCUCAGCGCUACAUGAAAAUGUAAUGUUUACUGACAAG<br>ACAUUCGCUCUCCUUGUGAGUAUUCGACAGGAGGCUCACAACAGGC    |
| Oligo 5669 | GGGAGACAAGAAUAAACGCUCGUUGCGGAACUAAAUAUCGUAACGGAACUACAAG<br>UCAUUCGCUCUCCUUGUAGGGCUUCGACAGGAGGCUCACAACAGGC    |
| 58PYO1A    | GGGCCAAAGAGCACUCCAUCGAUGGUCGUUUUUCGCACAUUCGCUCUCCGCAUAG<br>ACG                                               |
| 57PYO3A    | GGGACCGUUCAGAAAACGAACAGUCUAGUGUCGUCGACAUCGCUCUCCGGUGAUG<br>CU                                                |
| 49BRC1A    | GAGACGGUCGGGUCCAGAUAUUCGUUUCUGUCGAGUAGAGUGUGGGUC                                                             |
| 15THR1A    | GGTTGGTGTGGTTGG                                                                                              |
| 20THR2A    | GGTTGGTGTGGTTGGCAACC                                                                                         |
| 32THR4A    | GGTAGGGCAGGTGGGTGTTTCACTTTTGGG                                                                               |
| 97SPN2A    | GGGAUGUAAACUGAAUGAAAUGGUGAAGGACGGGUCCAGUAGGCGUCUUCGGCAGC<br>CUACUUGUUGAGUAGAGUGUGAGCUCCGUAACUAGUUACAUC       |



**Table S2. Conditions of selection in the SELEX protocol**

| Round                | 2' FY-RNA:<br>PVD-Pf5 | Target                                   | Length of<br>capture oligo<br>(nt) | Incubation<br>temperature<br>(°C) |
|----------------------|-----------------------|------------------------------------------|------------------------------------|-----------------------------------|
| 1                    | 1:1                   | 16 $\mu$ M PVD-Pf5                       | 6                                  | 4                                 |
| 2                    | 2:1                   | 5.5 $\mu$ M PVD-Pf5                      | 6                                  | 4                                 |
| 3                    | 3:1                   | 3.5 $\mu$ M PVD-Pf5                      | 7                                  | 4                                 |
| Counter<br>selection | 1:1                   | 10.5 $\mu$ M ENB and 10.5 $\mu$ M<br>ORB | 7                                  | 4                                 |
| 4                    | 5:1                   | 3.5 $\mu$ M PVD-Pf5                      | 8                                  | 4                                 |
| 5                    | 6:1                   | 1 $\mu$ M PVD-Pf5                        | 8                                  | 23                                |
| 6                    | 7:1                   | 0.6 $\mu$ M PVD-Pf5                      | 8                                  | 23                                |
| Counter<br>selection | 1:1                   | 3.2 $\mu$ M ENB and 3.2 $\mu$ M<br>ORB   | 8                                  | 23                                |
| 7                    | 8:1                   | 0.4 $\mu$ M PVD-Pf5                      | 8                                  | 23                                |
| 8                    | 10:1                  | 0.2 $\mu$ M PVD-Pf5                      | 9                                  | 23                                |
| 9                    | 10:1                  | 0.2 $\mu$ M PVD-Pf5                      | 9                                  | 23                                |

**Legend:** All siderophores (PVD-Pf5, ENB and ORB) were in the ferric form. PVD-Pf5 (pyoverdine Pf5), ENB (enterobactin) and ORB (ornibactin).



## 4 Supplementary Figures

## 4.1 Figure S1

Analysis of NextGen sequencing results

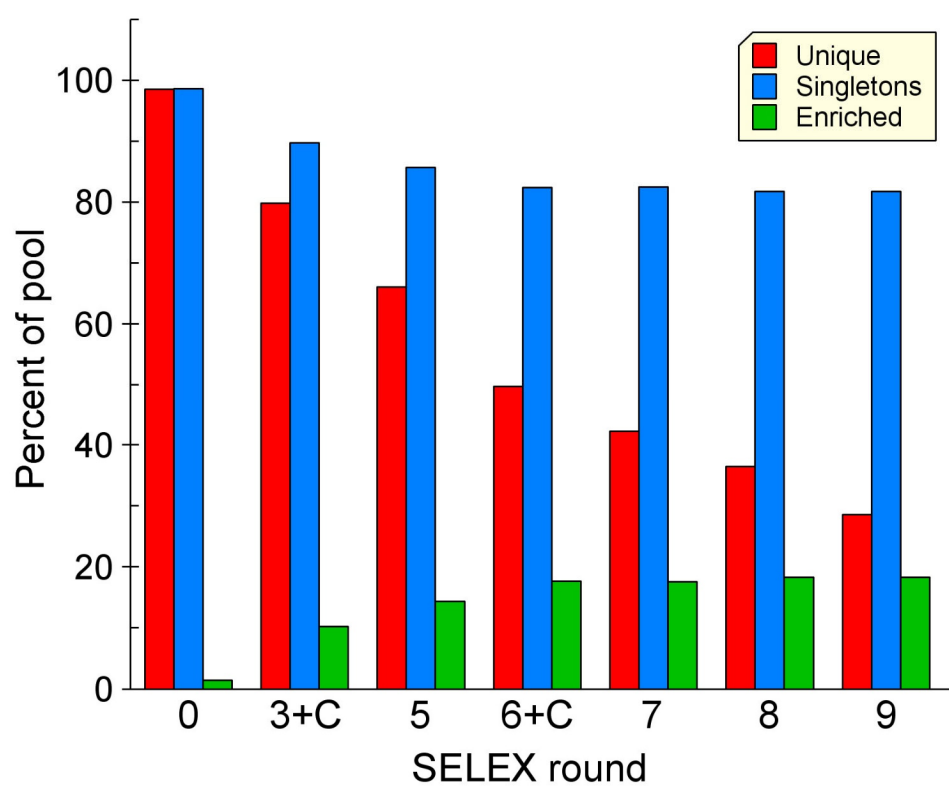

**LEGEND:** The percent of each round identified as the unique fraction (number of species in pool divided by pool size), Singletons (species present only once in the database) and Enriched species (species present more than once in the database) is plotted for the original pool (round 0) and rounds 3 through 9. Rounds 3 and 6 include counterselections that were performed after the identified selection round.



## 4.2 Figure S2

### uv/vis absorption spectra of synthesized compounds 1-4

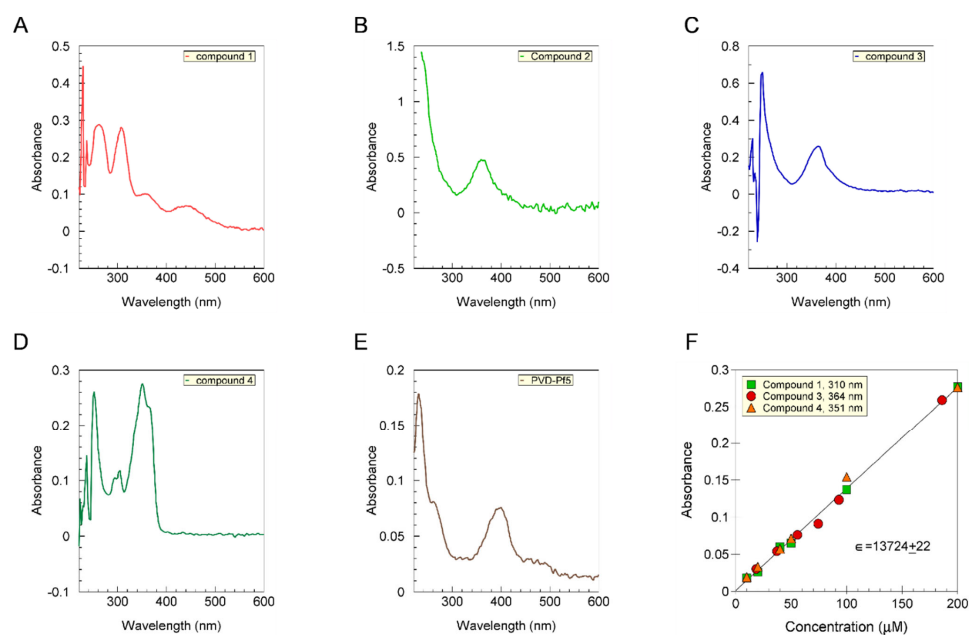

**LEGEND:** A-E) UV-Vis spectra of compound 1, 2, 3, 4 dissolved in DMSO and PVD-Pf5 dissolved in water, F) Concentration vs absorbance at maximum (310nm, 359nm, 364nm, 351nm, and 400nm for 1, 2, 3, 4 and PVD-Pf5 respectively) to determine the extinction coefficients of compounds 1, 3 and 4.



4.3 Figure S3

Predicted structures

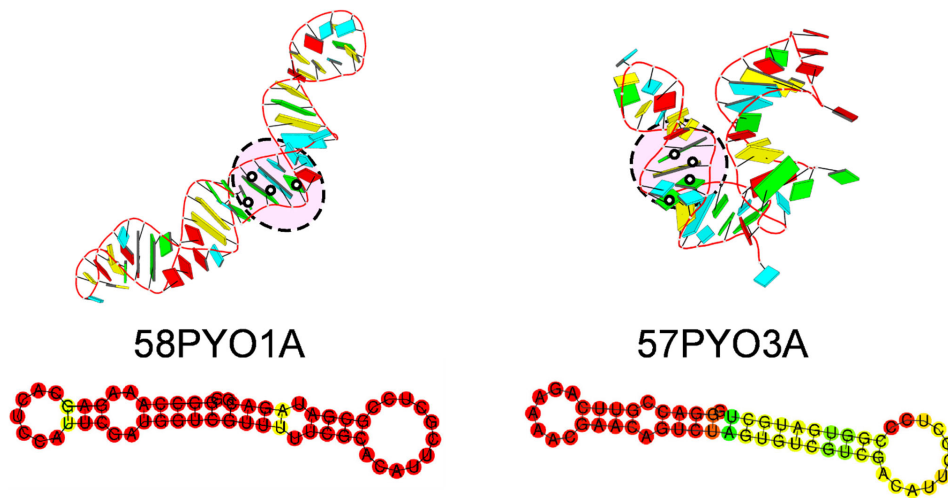

**LEGEND:** **Top:** 3D structures of 58PYO1A and 57PYO3A predicted using 3dRNA and visualized using x3DNA. The black circles identify the positions of Gs proposed to form a G-quartet. **Bottom:** 2D structural renditions predicted by RNA fold.



## 4.4 Figure S4

## The effect of aptamers on the fluorescence spectrum of HPTA-1

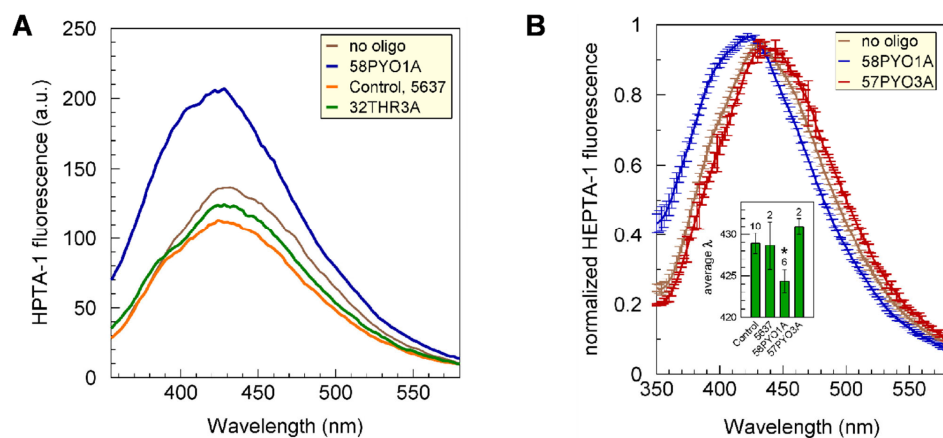

**LEGEND:** **A.** The fluorescence of spectra ( $\lambda^{\text{ex}} = 304 \text{ nm}$  and  $\lambda^{\text{em}}$  scan (350-600 nm) of 6  $\mu\text{M}$  HPTA-1 alone and in combination with the 2  $\mu\text{M}$  identified oligonucleotides are plotted with from 340-590 nm. Single smoothed spectra are shown. **B.** The fluorescence of spectra ( $\lambda^{\text{ex}} = 304 \text{ nm}$  and  $\lambda^{\text{em}}$  scan (350-600 nm) of 6  $\mu\text{M}$  HPTA-1 alone and in combination with the 2  $\mu\text{M}$  58PYO1A or 57PYO3A. Individual spectra were first normalized to the maximum peak height for each spectrum then independently obtained normalized spectra were averaged for each condition and the averaged spectra smoothed. Contributing numbers of independent spectra were “no oligonucleotide” (10), 58PYO1A (6) and 57PYO3A (2). The SEM for the spectral averages are shown.



#### 4.5 Figure S5

The effect of freeze-thaw on the CD spectrum and molecular size of 57PYO3A

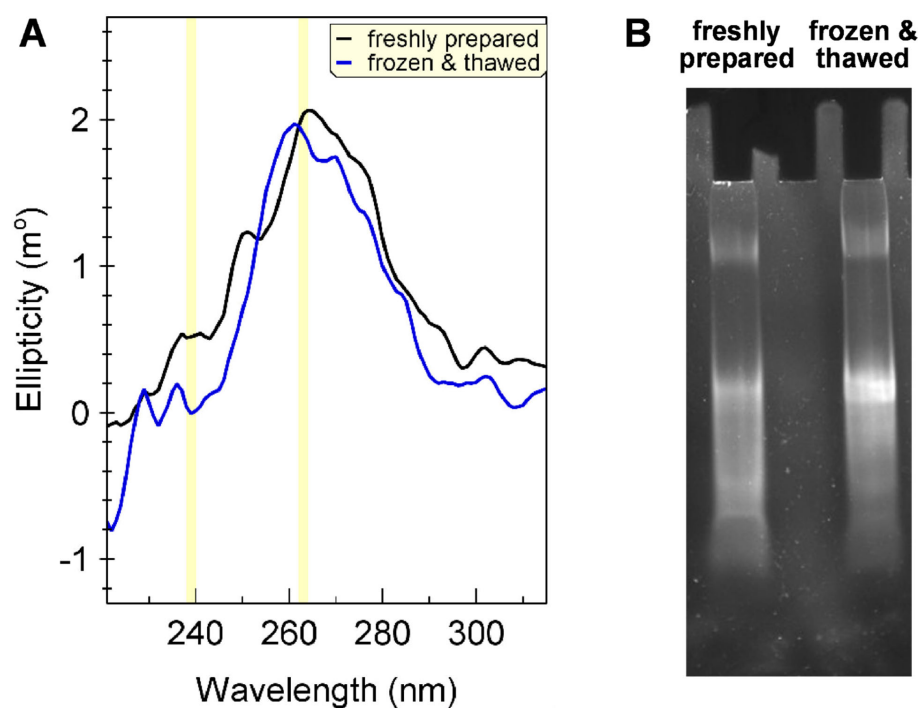

**LEGEND:** A. CD spectra 2uM of 57PYO3A for freshly prepared and frozen thawed (-20 °C for 18 h then to 23 °C) sample in SSMB1. Each spectrum is the smoothed average of two independent CD spectral collections of 3 scans each. B. nondenaturing gel electrophoresis of 57PYO3A when freshly prepared and after freeze-thaw.



## 4.6 Figure S6

## The effect of salt combinations on PVD-Pf5 binding to 57PYO3A

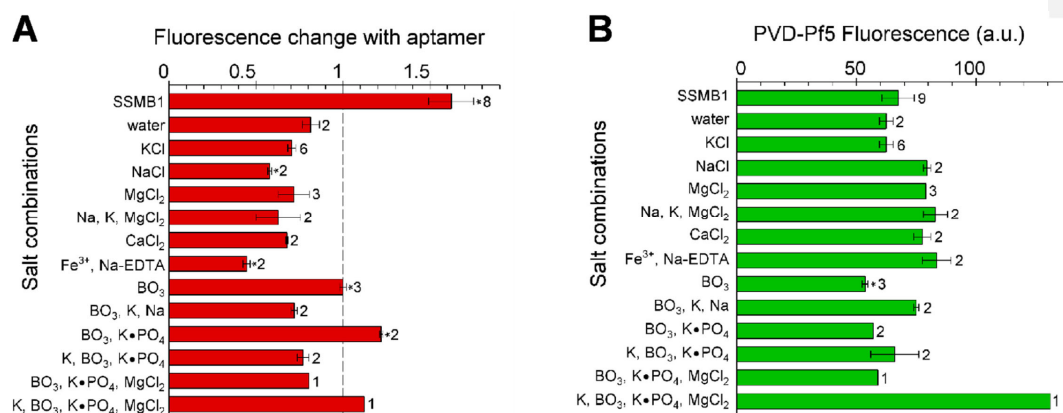

**LEGEND:** **A.** For each salt combination, the maximum PVD-Pf5 fluorescence (measured at 460–466 nm, depending on the spectrum) in the presence of 400 nM aptamer was divided by the maximum fluorescence in its absence. The mean ratio from all experiments for each salt mix is shown as red bars, with error bars indicating the standard error of the mean. **B.** The fluorescence of PVD-Pf5 in the absence of aptamer is shown for each salt mixture in A. Statistical significance relative to water alone was assessed using the Student's *t*-test ( $p < 0.05$ ). Numbers to the right of the bars indicate the number of independent measurements used to calculate each mean. Phosphate was supplied as  $\text{KH}_2\text{PO}_4$ , abbreviated here as  $\text{K}\cdot\text{PO}_4$ .



#### 4.7 Figure S7

Raw data for NMM spectra in Fig. 4D with and without smoothing

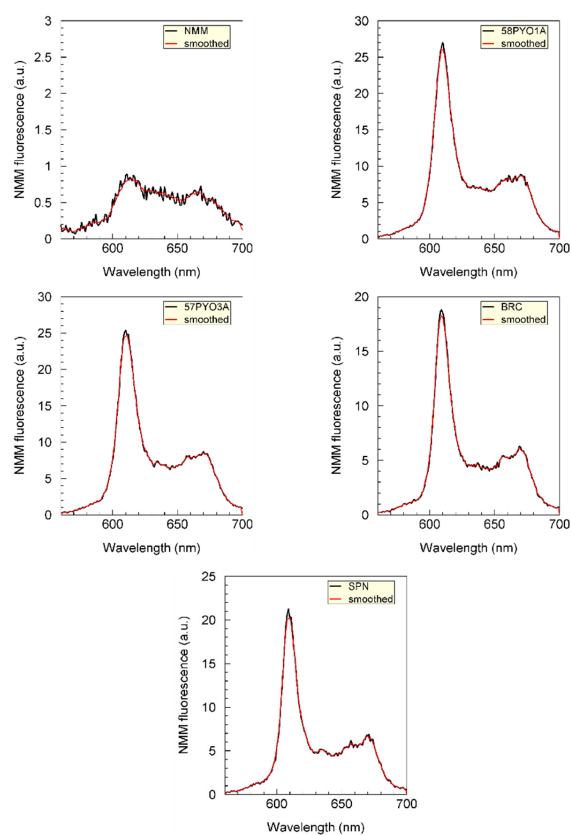



4.8 Figure S8

Raw data for CD spectra in Fig. 4E with and without smoothing

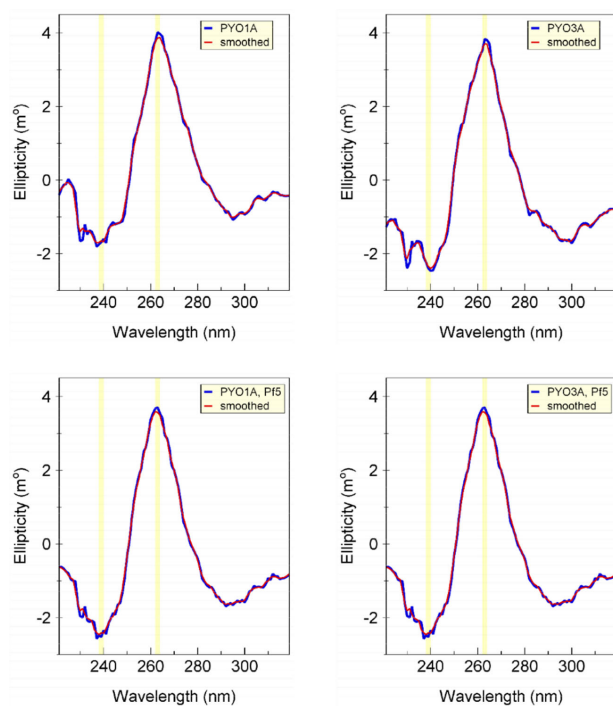



#### 4.9 Figure S9

Raw data for CD spectra in Fig. 5B with and without baseline adjustments and smoothing

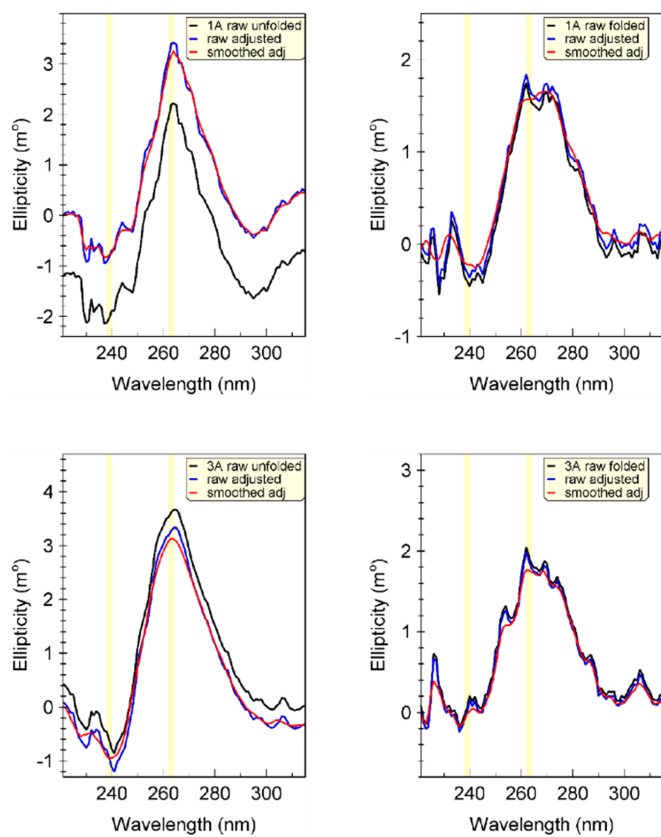



#### 4.10 Figure S10

Raw data for CD spectra in Fig. 5C with and without baseline adjustments and smoothing

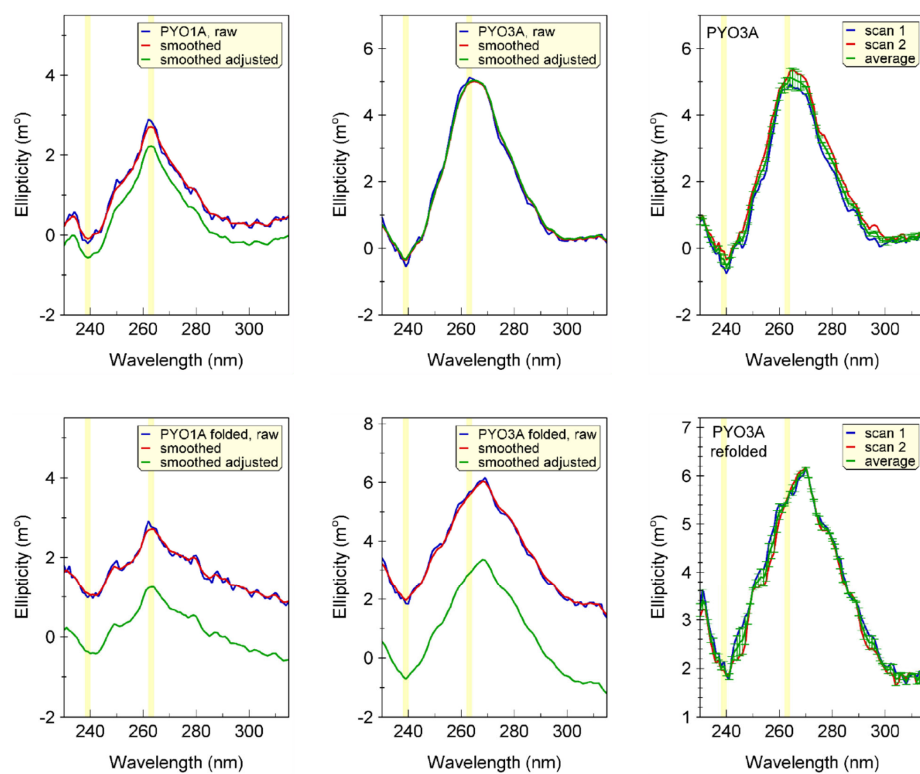



4.11 Figure S11

Raw data for CD spectra in Fig. 5C with and without baseline adjustments and smoothing

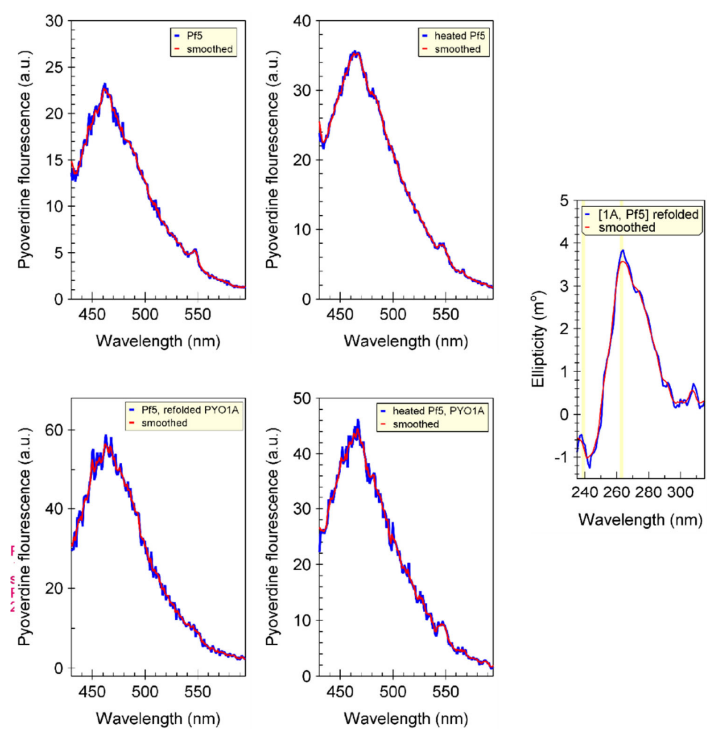



#### 4.12 Figure S12

Raw data for CD spectra in Fig. 6C with and without smoothing

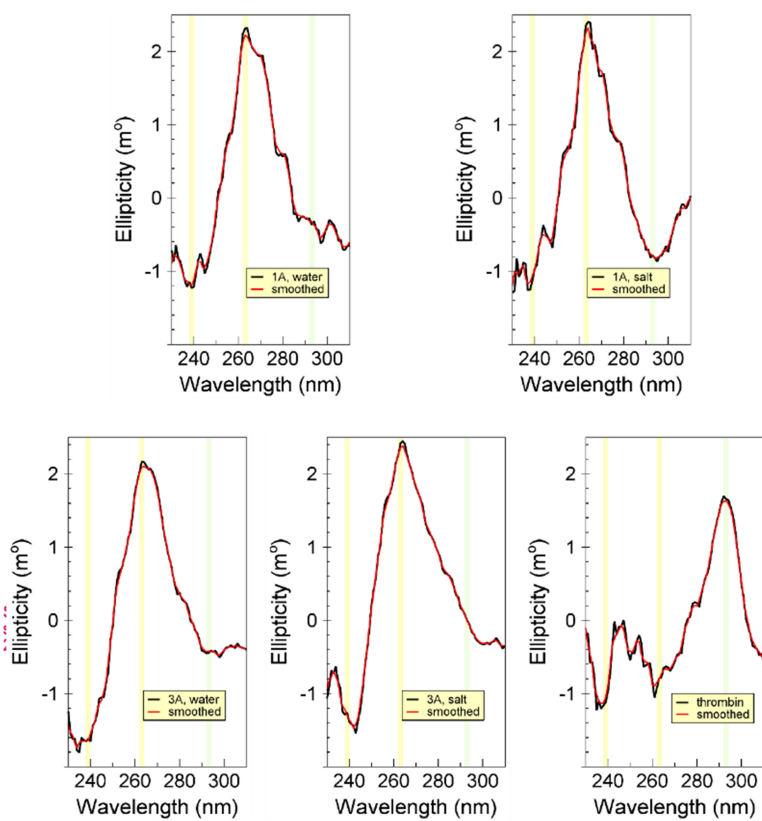



Figure S13

Full gel image for Figure 4G

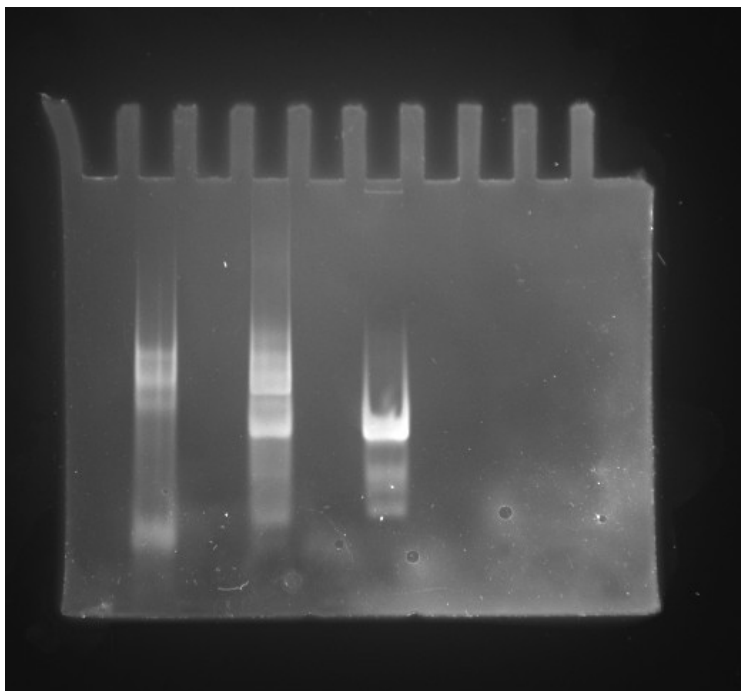

## 5 Citations

1. Levine, H.A., and Nilsen-Hamilton, M. A mathematical analysis of SELEX. *Comput Biol Chem* **31**, 11-35 10.1016/j.compbiolchem.2006.10.002 (2007).
2. Hoinka, J., Backofen, R., and Przytycka, T.M. AptasUITE: A Full-Featured Bioinformatics Framework for the Comprehensive Analysis of Aptamers from HT-SELEX Experiments. *Molecular therapy. Nucleic acids* **11**, 515-517 10.1016/j.omtn.2018.04.006 (2018).
